# Supplementary material for: CuS–Pt(iv)–PEG–FA nanoparticles for targeted photothermal and chemotherapy
Source: Royal Society of Chemistry journal article supplement (doi:10.1039/c6tb01540a), 2016-01-01
Supplement: c6tb01540a1.pdf [file c6tb01540a1.pdf]

## Electronic Supplementary Information

### CuS-Pt (IV)-PEG-FA nanoparticles for targeted Photothermal and chemo-therapy

Huiting Bi, Yunlu Dai,\* Jiating Xu, Ruichan Lv, Fei He, Shili Gai, Dan Yang, and Piaoping Yang\*

#### Calculation of the photothermal conversion efficiency

The photothermal conversion efficiency of CuS was determined according to previous method.<sup>1,2</sup> Detailed calculation was given as following:

Based on the total energy balance for this system:

$$\sum_i m_i c_{p,i} \frac{dT}{dt} = Q_{NPs} + Q_s - Q_{loss} \quad (1)$$

$m$  and  $c_p$  are the mass and heat capacity of solvent (water).  $T$  is the solution temperature.

$Q_{NPs}$  is the photothermal energy input by CuS:

$$Q_{NPs} = I(1 - 10^{-A_\lambda})\eta \quad (2)$$

$I$  is the laser power,  $A_\lambda$  is the absorbance of CuS at the wavelength of 808 nm, and  $\eta$  is the conversion efficiency from the absorbed light energy to thermal energy.

$Q_s$  is the heat associated with the light absorbance of the solvent, which is measured independently to be  $Q_s = (5.4 \times 10^{-4}) I J s^{-1}$  using pure water without CuS.

$Q_{loss}$  is thermal energy lost to the surroundings:

$$Q_{loss} = hA\Delta T \quad (3)$$

$h$  is the heat transfer coefficient,  $A$  is the surface area of the container, and  $\Delta T$  is the

temperature change, which is defined as  $T - T_{surr}$  ( $T$  and  $T_{surr}$  are the solution temperature and ambient temperature of the surroundings, respectively).

At the maximum steady-state temperature, the heat input is equal to the heat output, that is:

$$Q_{NPs} + Q_s = Q_{loss} = hA\Delta T_{max} \quad (4)$$

$\Delta T_{max}$  is the temperature change at the maximum steady-state temperature. According to the Eq.2 and Eq.4, the photothermal conversion efficiency ( $\eta$ ) can be determined:

$$\eta = \frac{hA\Delta T_{max} - Q_s}{I(1 - 10^{-A\lambda})} \quad (5)$$

In this equation, only  $hA$  is unknown for calculation. In order to get the  $hA$ , we herein introduce  $\theta$ , which is defined as the ratio of  $\Delta T$  to  $\Delta T_{max}$ :

$$\theta = \frac{\Delta T}{\Delta T_{max}} \quad (6)$$

Substituting Eq.6 into Eq.1 and rearranging Eq.1:

$$\frac{d\theta}{dt} = \frac{hA}{\sum_i m_i C_{p,i}} \left[ \frac{Q_{NPs} + Q_s}{hA\Delta T_{max}} - \theta \right] \quad (7)$$

When the laser was shut off, the  $Q_{NPs} + Q_s = 0$ , Eq.7 changed to:

$$dt = - \frac{\sum_i m_i C_{p,i}}{hA} \frac{d\theta}{\theta} \quad (8)$$

Integrating Eq.8 gives the expression:

$$t = - \frac{\sum_i m_i C_{p,i}}{hA} \ln \theta \quad (9)$$

Thus,  $hA$  can be determined by applying the linear time data from the cooling period vs  $-\ln \theta$  (Figure 3d). Substituting  $hA$  value into Eq.5, the photothermal conversion efficiency ( $\eta$ ) of CuS solution can be calculated.

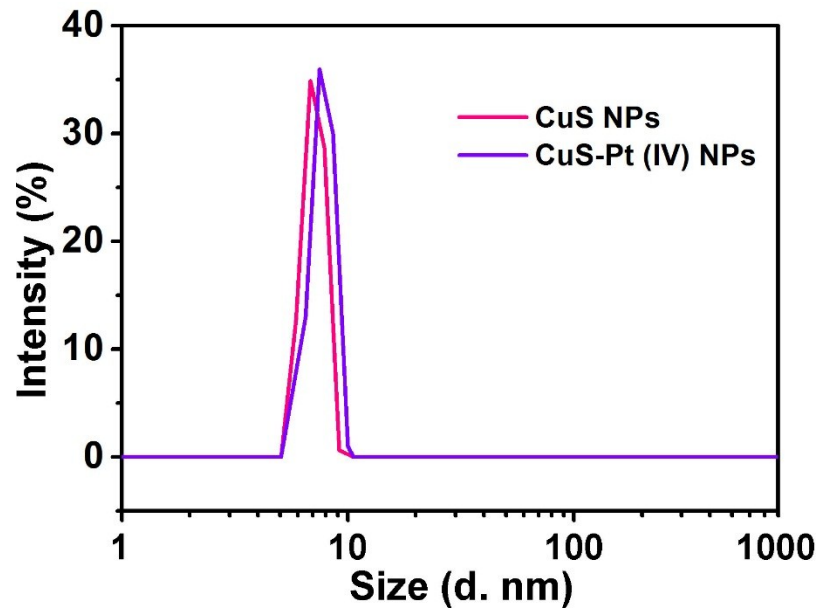

**Fig. S1** The dynamic light scattering properties of CuS NPs and CuS-Pt (IV) NPs dispersed in deionized water.

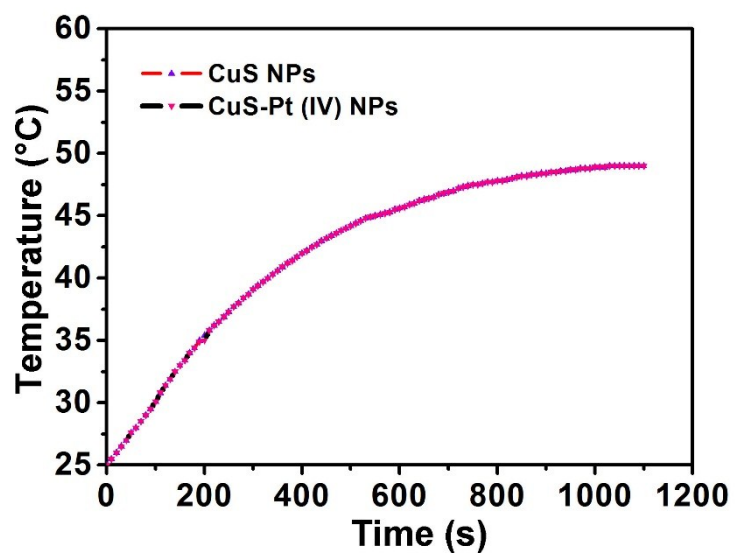

Fig. S2 Temperature elevation curves of CuS NPs and CuS-Pt (IV) NPs.

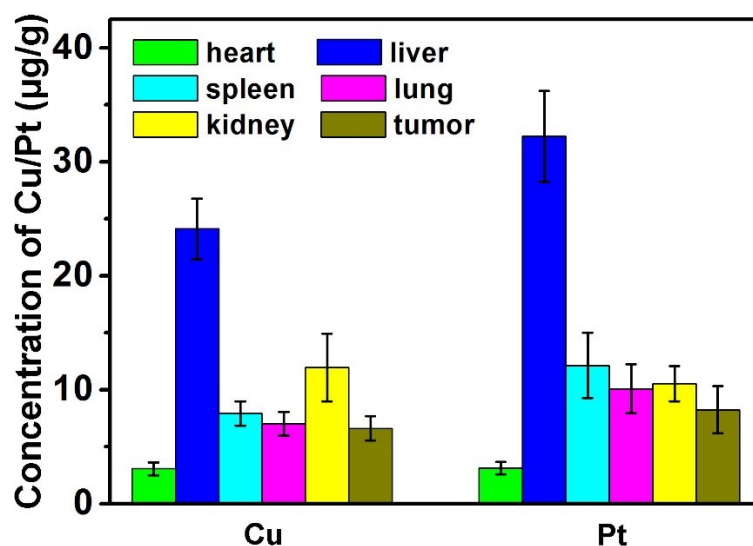

**Fig. S3** The biodistribution of Cu and Pt in major organs of mice after injection of CuS-Pt NPs intravenously for 12 h.

## References

1. Y. Liu, K. Ai, J. Liu, M. Deng, Y. He and L. Lu, *Adv. Mater.*, 2013, **25**, 1353-1359.
2. D. K. Roper, W. Ahn and M. Hoepfner, *J. Phys. Chem. C*, 2007, **111**, 3636-3641.
